# Supplementary material for: Factors Associated with the Patient’s Decision to Avoid Healthcare during the COVID-19 Pandemic
Source: MDPI journal article supplement (doi:10.3390/ijerph182413239), 2021-12-15
Supplement: s1 [file s1]

Table S1. Prevalence ratios for healthcare avoidance, adjusted for sex, age group, region, education, health status and pandemic period.

|                                                                                                      | Crude       |                     | Adjusted    |                     |
|------------------------------------------------------------------------------------------------------|-------------|---------------------|-------------|---------------------|
|                                                                                                      | PR          | 95% CI              | PR          | 95% CI              |
| <b>Sex</b> (ref. Male)                                                                               | <b>1.26</b> | <b>(1.19; 1.34)</b> | <b>1.27</b> | <b>(1.20; 1.35)</b> |
| <b>Age</b> (ref. 26-65)                                                                              |             |                     |             |                     |
| 18-25                                                                                                | <b>0.86</b> | <b>(0.76; 0.98)</b> | <b>0.86</b> | <b>(0.75; 0.98)</b> |
| >65                                                                                                  | 0.97        | (0.91; 1.04)        | 0.98        | (0.92; 1.05)        |
| <b>Region</b> (ref. Lisbon and Tagus Valey)                                                          |             |                     |             |                     |
| North                                                                                                | <b>0.93</b> | <b>(0.87; 0.98)</b> | <b>0.92</b> | <b>(0.87; 0.98)</b> |
| Center                                                                                               | <b>0.93</b> | <b>(0.86; 0.99)</b> | <b>0.92</b> | <b>(0.86; 0.98)</b> |
| Alentejo                                                                                             | 1.06        | (0.95; 1.18)        | 1.07        | (0.96; 1.19)        |
| Algarve                                                                                              | 1.06        | (0.95; 1.18)        | 1.06        | (0.95; 1.18)        |
| Azores                                                                                               | <b>0.67</b> | <b>(0.50; 0.90)</b> | <b>0.66</b> | <b>(0.49; 0.89)</b> |
| Madeira                                                                                              | 0.71        | (0.49; 1.03)        | 0.72        | (0.50; 1.03)        |
| <b>Education</b> (ref. University)                                                                   |             |                     |             |                     |
| Basic/None                                                                                           | 0.95        | (0.86; 1.05)        | 0.95        | (0.86; 1.05)        |
| Secondary                                                                                            | 0.96        | (0.90; 1.01)        | 0.95        | (0.90; 1.00)        |
| <b>Occupation</b> (ref. Worker)                                                                      |             |                     |             |                     |
| Student                                                                                              | 0.93        | (0.82; 1.06)        | 1.06        | (0.88; 1.26)        |
| Retired                                                                                              | 1.02        | (0.96; 1.09)        | 1.08        | (0.98; 1.19)        |
| Unemployed                                                                                           | 1.01        | (0.91; 1.13)        | 1.02        | (0.92; 1.14)        |
| Other                                                                                                | 1.08        | (0.99; 1.18)        | 1.06        | (0.97; 1.17)        |
| <b>Confidence in the capacity of health services to respond to COVID-19</b> (ref. High)              |             |                     |             |                     |
| Low                                                                                                  | <b>1.21</b> | <b>(1.15; 1.27)</b> | <b>1.19</b> | <b>(1.13; 1.25)</b> |
| <b>Confidence in the capacity of health services to respond to non-COVID-19</b> (ref. High)          |             |                     |             |                     |
| Low                                                                                                  | <b>1.26</b> | <b>(1.20; 1.32)</b> | <b>1.24</b> | <b>(1.18; 1.30)</b> |
| <b>Monthly household income</b> (ref. >2501€)                                                        |             |                     |             |                     |
| <650€                                                                                                | 0.99        | (0.89; 1.11)        | 0.98        | (0.87; 1.11)        |
| 651-1000€                                                                                            | 1.08        | (1.00; 1.17)        | 1.07        | (0.98; 1.16)        |
| 1001-1500€                                                                                           | 1.06        | (0.98; 1.14)        | 1.02        | (0.95; 1.10)        |
| 1501-2000€                                                                                           | 1.02        | (0.95; 1.11)        | 1.02        | (0.94; 1.10)        |
| 2001-2500€                                                                                           | 1.07        | (0.99; 1.16)        | 1.04        | (0.97; 1.13)        |
| <b>Lost of income due to the pandemic</b> (ref. No)                                                  | <b>1.09</b> | <b>(1.04; 1.15)</b> | <b>1.10</b> | <b>(1.04; 1.15)</b> |
| <b>Perception of the health status</b> (ref. Very good/Good)                                         |             |                     |             |                     |
| Reasonable                                                                                           | <b>1.26</b> | <b>(1.20; 1.32)</b> | <b>1.25</b> | <b>(1.19; 1.31)</b> |
| Bad/Very bad                                                                                         | <b>1.37</b> | <b>(1.23; 1.52)</b> | <b>1.38</b> | <b>(1.23; 1.54)</b> |
| <b>Number of comorbidities</b> (ref. 0)                                                              |             |                     |             |                     |
| 1                                                                                                    | <b>1.12</b> | <b>(1.06; 1.18)</b> | <b>1.06</b> | <b>(1.01; 1.12)</b> |
| ≥2                                                                                                   | <b>1.11</b> | <b>(1.04; 1.18)</b> | 1.02        | (0.96; 1.10)        |
| <b>Frequency of agitation, sadness or anxiety due to the physical distance measures</b> (ref. Never) |             |                     |             |                     |
| Some days                                                                                            | <b>1.34</b> | <b>(1.24; 1.43)</b> | <b>1.24</b> | <b>(1.15; 1.33)</b> |

|                                                                                                   | Crude       |                     | Adjusted    |                     |
|---------------------------------------------------------------------------------------------------|-------------|---------------------|-------------|---------------------|
|                                                                                                   | PR          | 95% CI              | PR          | 95% CI              |
| Almost every day                                                                                  | <b>1.71</b> | <b>(1.58; 1.85)</b> | <b>1.54</b> | <b>(1.42; 1.67)</b> |
| Every day                                                                                         | <b>1.77</b> | <b>(1.61; 1.94)</b> | <b>1.57</b> | <b>(1.42; 1.72)</b> |
| <b>Pandemic period (ref. P6)</b>                                                                  |             |                     |             |                     |
| P2                                                                                                | <b>1.18</b> | <b>(1.09; 1.27)</b> | <b>1.20</b> | <b>(1.11; 1.30)</b> |
| P3                                                                                                | <b>1.09</b> | <b>(1.01; 1.18)</b> | <b>1.13</b> | <b>(1.04; 1.22)</b> |
| P4                                                                                                | <b>1.23</b> | <b>(1.16; 1.31)</b> | <b>1.25</b> | <b>(1.18; 1.33)</b> |
| P5                                                                                                | <b>1.09</b> | <b>(1.02; 1.16)</b> | <b>1.08</b> | <b>(1.01; 1.16)</b> |
| <b>Self-Perceived Risk to get COVID-19 Infection (ref. High)</b>                                  |             |                     |             |                     |
| Moderate                                                                                          | 0.94        | (0.88; 1.01)        | 0.98        | (0.91; 1.05)        |
| Low/No risk                                                                                       | <b>0.81</b> | <b>(0.76; 0.88)</b> | <b>0.88</b> | <b>(0.82; 0.95)</b> |
| Unsure                                                                                            | 0.91        | (0.82; 1.01)        | 0.94        | (0.84; 1.04)        |
| <b>Self-Perceived Risk to Develop Severe Disease Following COVID-19 Infection (ref. High)</b>     |             |                     |             |                     |
| Moderate                                                                                          | <b>0.92</b> | <b>(0.87; 0.98)</b> | 0.98        | (0.92; 1.04)        |
| Low/No risk                                                                                       | <b>0.74</b> | <b>(0.69; 0.79)</b> | <b>0.82</b> | <b>(0.77; 0.88)</b> |
| Unsure                                                                                            | <b>0.86</b> | <b>(0.80; 0.93)</b> | <b>0.91</b> | <b>(0.84; 0.99)</b> |
| <b>Self-perceived risk to get infected in a health institution (ref. High)</b>                    |             |                     |             |                     |
| Moderate                                                                                          | <b>0.75</b> | <b>(0.70; 0.79)</b> | <b>0.74</b> | <b>(0.70; 0.79)</b> |
| Low/No risk                                                                                       | <b>0.44</b> | <b>(0.41; 0.48)</b> | <b>0.44</b> | <b>(0.40; 0.48)</b> |
| Unsure                                                                                            | <b>0.73</b> | <b>(0.63; 0.86)</b> | <b>0.73</b> | <b>(0.63; 0.85)</b> |
| <b>Perception of the adequacy of the measures implemented by the Government (ref. Positive)</b>   |             |                     |             |                     |
| Negative                                                                                          | <b>1.06</b> | <b>(1.01; 1.11)</b> | <b>1.07</b> | <b>(1.02; 1.12)</b> |
| <b>View on the information provided by the health authorities (ref. Clear and understandable)</b> |             |                     |             |                     |
| Unclear and confusing                                                                             | <b>1.12</b> | <b>(1.03; 1.21)</b> | <b>1.11</b> | <b>(1.03; 1.21)</b> |
| Inconsistent and contradictory                                                                    | <b>0.90</b> | <b>(0.82; 0.98)</b> | 0.92        | (0.83; 1.01)        |

PR: prevalence ratio, CI: confidence interval.
